# Supplementary material
Source: publisher site journal article supplement (https://www.dovepress.com/article/433070)
Supplement: Supplementary file 1 [file get_supplementary_file.php]

**Supplementary figures**


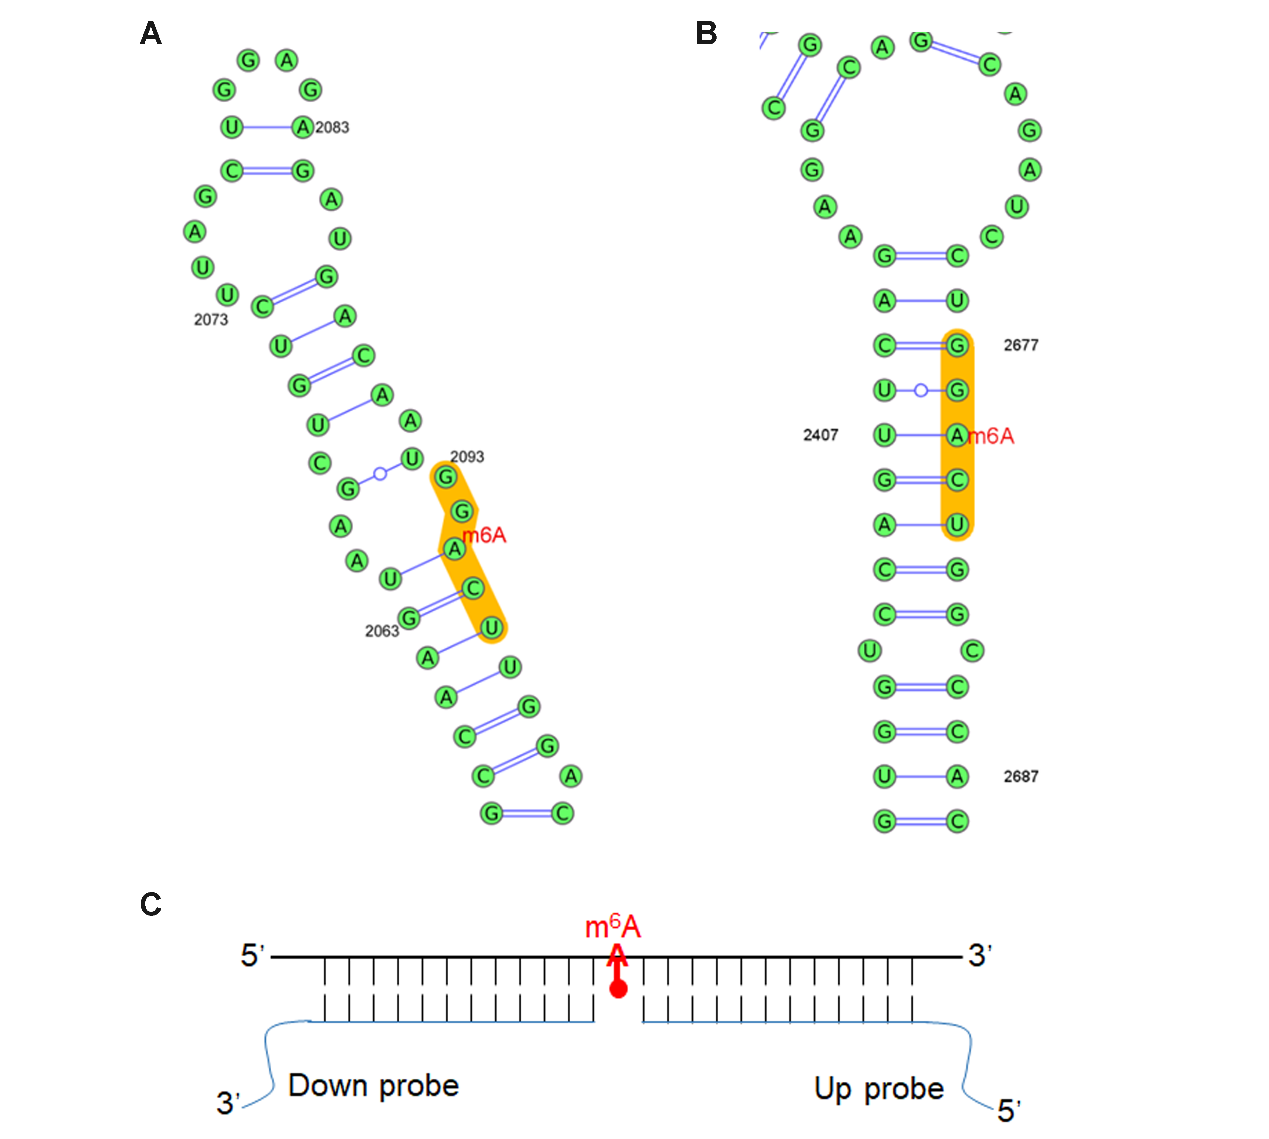
**Supplementary Figure 1 The predicted m6A modification sites of LEAWBIH.** **(A)** The predicted 2095 m6A modification site of LEAWBIH by the online tool SRAMP. **(B)** The predicted 2679 m6A modification site of LEAWBIH by the online tool SRAMP. **(C)** Schematic of the SELECT m6A detection method.
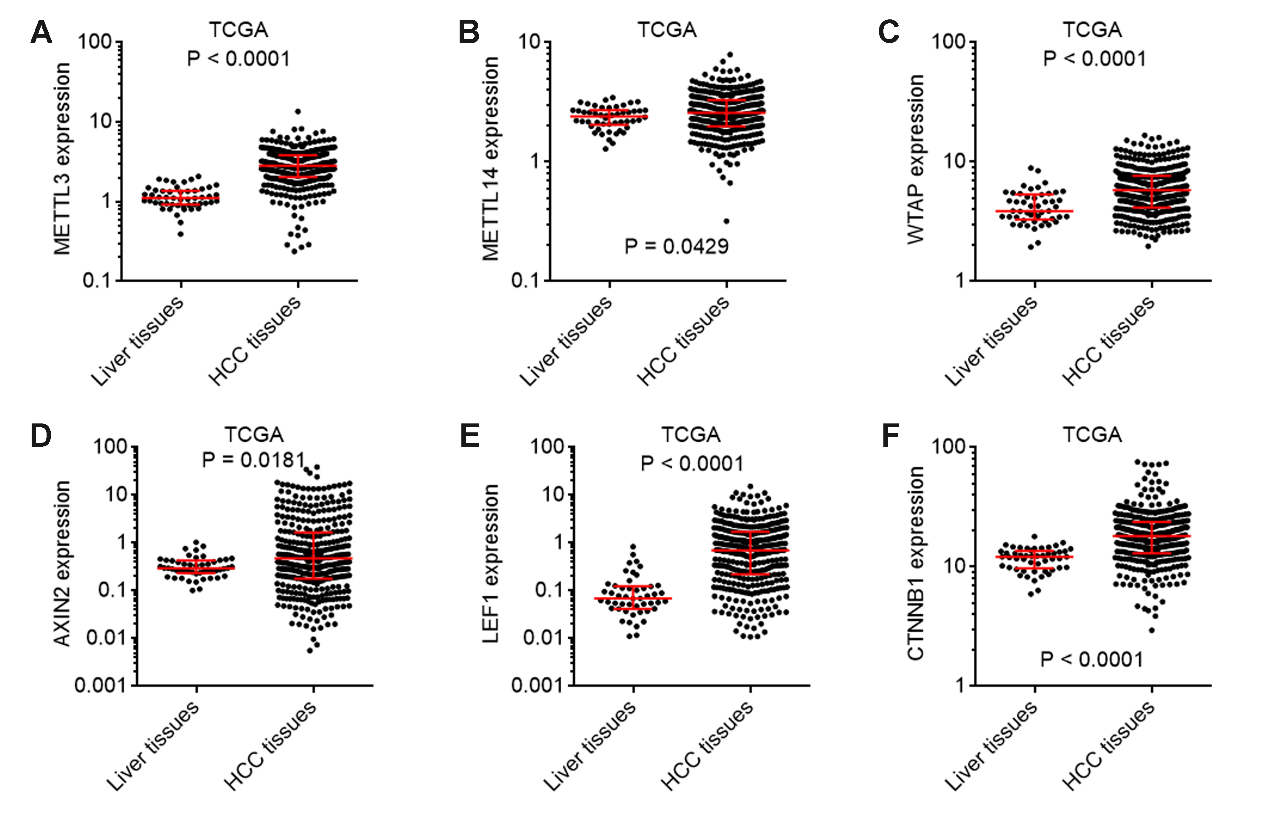
**Supplementary Figure 2 METTL3, METTL14, WTAP, AXIN2, LEF1, and CTNNB1 were increased in HCC.** METTL3 (**A**), METTL14 (**B**), WTAP (**C**), AXIN2 (**D**), LEF1 (**E**), and CTNNB1 (**F**) expression in 371 HCC tissues and 50 normal liver tissues, based on the TCGA-LIHC RNA-seq data. Results are presented as median with interquartile range. P values were calculated by Mann-Whitney test.


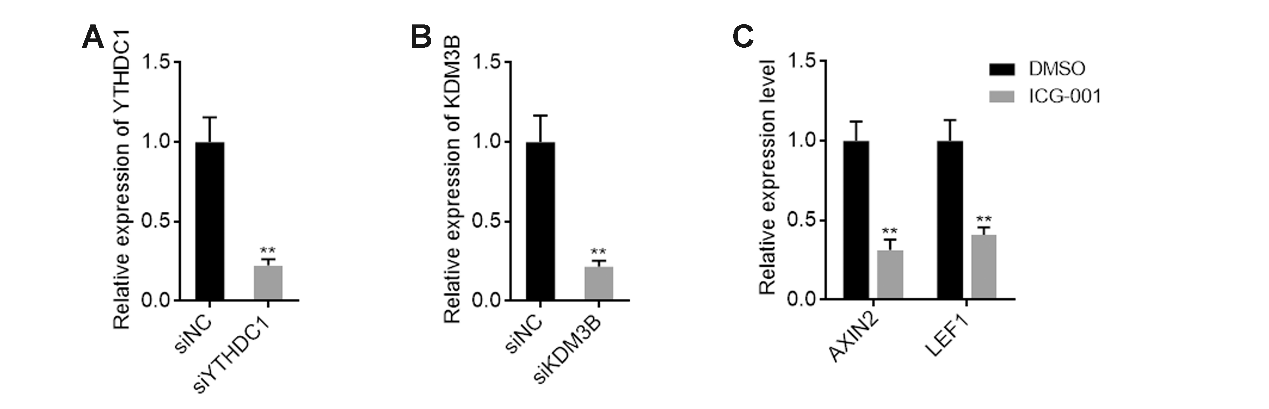
**Supplementary Figure 3 The knockdown effects of YTHDC1 and KDM3B and the inhibition effects of ICG**-**001. (A)** The expression of YTHDC1 in HuH-7 cells with depletion of YTHDC1 was measured by qPCR. **(B)** The expression of KDM3B in HuH-7 cells with depletion of KDM3B was measured by qPCR. **(C)** The expression of Wnt/β-catenin targets in HuH-7 cells treated with or without 5 μM ICG-001 was measured by qPCR. Results are presented as mean ± SD of 3 independent experiments. **P < 0.01 by Student’s *t*-test.
